# Supplementary material for: Comparative Analysis of Skeletal Muscle DNA Methylation and Transcriptome of the Chicken Embryo at Different Developmental Stages
Source: Front Physiol. 2021 Jul 2;12:697121. doi: 10.3389/fphys.2021.697121 (PMC8283280; doi:10.3389/fphys.2021.697121)
Supplement: Supplementary Table 1 — Gene Ontology (GO) analysis of PPI network proteins. [file Table_1.XLSX]

## Sheet: Sheet1
GO_term (Biological Process)	Description	Count in the network	Strength	False dicovery rate
GO:0014842	regulation of skeletal muscle satellite cell proliferation	2 of 5	2.39	0.0048
GO:0099173	postsynapse organization	2 of 9	2.14	0.006
GO:0008543	fibroblast growth factor receptor signaling pathway	2 of 10	2.09	0.0061
GO:0007519	skeletal muscle tissue development	2 of 13	1.98	0.0062
GO:0090257	regulation of muscle system process	2 of 15	1.92	0.0069
GO_term (Molecular Function)	Description	Count in the network	Strength	False dicovery rate
GO:0005388	calcium-transporting ATPase activity	2 of 3	2.62	0.0015
GO:0070888	E-box binding	2 of 8	2.19	0.0028
GO:0043492	ATPase activity, coupled to movement of substances	2 of 9	2.14	0.0028
GO:0004714	transmembrane receptor protein tyrosine kinase activity	2 of 22	1.75	0.0032
GO:0022890	inorganic cation transmembrane transporter activity	3 of 69	1.43	0.0028
GO_term (Cellular Component)	Description	Count in the network	Strength	False dicovery rate
GO:0033017	sarcoplasmic reticulum membrane	2 of 4	2.49	0.0007
GO:0030017	sarcomere	2 of 36	1.54	0.0076
GO:0015629	actin cytoskeleton	3 of 65	1.46	0.0012
GO:0005667	transcription regulator complex	2 of 49	1.4	0.0109
GO:0098588	bounding membrane of organelle	4 of 169	1.17	0.0012
